# Supplementary material for: Copolymer Based on Polyglycerol-Acrylate-Lactate as Potential Water Viscosifier and Surfactant for Enhanced Oil Recovery
Source: Hindawi journal article supplement (doi:10.1155/2020/3464670), 2020-11-02
Supplement: f1 [file 3464670.f1.docx]

**Supporting Information**

**
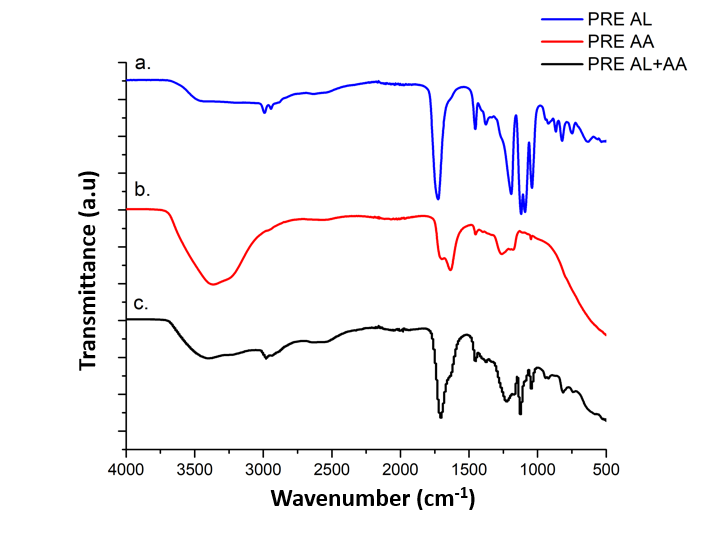
**

**Figure S1.** IR spectra of synthesized pre-polymers.

The spectrum of Figure S1a shows the pre-polymerization product of lactic acid in order to obtain lactide isomer. In this spectrum, there are characteristic bands from lactic acid, as follows: Around 3500 to 3200 cm-1, the O-H tension of the acid component is observed. At 1730 cm-1, a peak related to the carboxylic acid group is observed. Also, between 1200-950 cm-1, the voltage vibrations C-C and C-O [46] are observed. However, besides around 1260 cm-1, a shoulder or bump related to the asymmetric vibration C-O-C in the lactonic ring is observed, suggesting lactide formation during pre-polymerization of lactic acid [47]. Figure S1b shows the result of the pre-polymerization of acrylic acid, showing the characteristic band of the C-OH tension of the acrylic polyacid around 1707 cm-1, suggesting that in this process, the partial polymerization of acrylic acid occurred [48]. Finally, the spectrum of the pre-polymerization product of lactic acid and acrylic acid is shown in Figure S1c. The plausible mechanism of free radical polymerization between lactic acid and acrylic acid has been previously reported [49]. The peak around 1710 cm-1 is related to the tension –C = O characteristic of this polymerization, and the visible shoulder close to this contribution is related to free acids [50].
